# Supplementary material for: Hexagonal MoO3 as a zinc intercalation anode towards zinc metal-free zinc-ion batteries
Source: Royal Society of Chemistry journal article supplement (doi:10.1039/d0ta02236e), 2020-01-01
Supplement: d0ta02236e1.pdf [file d0ta02236e1.pdf]

## Supplementary Information

### Hexagonal MoO<sub>3</sub> as Zinc Intercalation Anode towards Zinc Metal-Free Zinc-Ion Battery

Ting Xiong<sup>a,b</sup>, Yaoxin Zhang<sup>a</sup>, Yinming Wang<sup>a</sup>, Wee Siang Vincent Lee<sup>\* a</sup>, Junmin  
Xue<sup>\* a</sup>

<sup>a</sup> National University of Singapore, Department of Materials Science and Engineering,  
Singapore 117573.

<sup>b</sup> Centre for Advanced 2D Materials and Graphene Research Centre, National  
University of Singapore, Singapore 117546.

\*To whom correspondence should be addressed. E-mail: mseleew@nus.edu.sg (Wee  
Siang Vincent Lee); msexuejm@nus.edu.sg (Junmin Xue). Tel./fax +65 65164655.

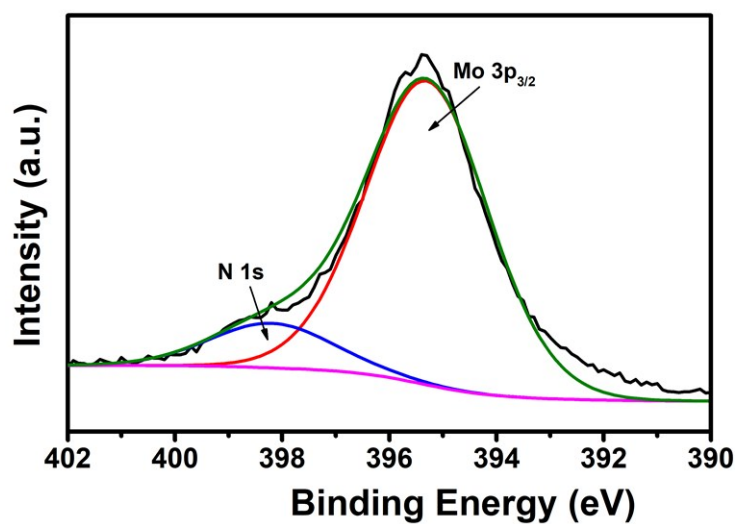

**Fig. S1** N 1s and Mo 3p<sub>3/2</sub> XPS of the as-prepared h-MoO<sub>3</sub>.

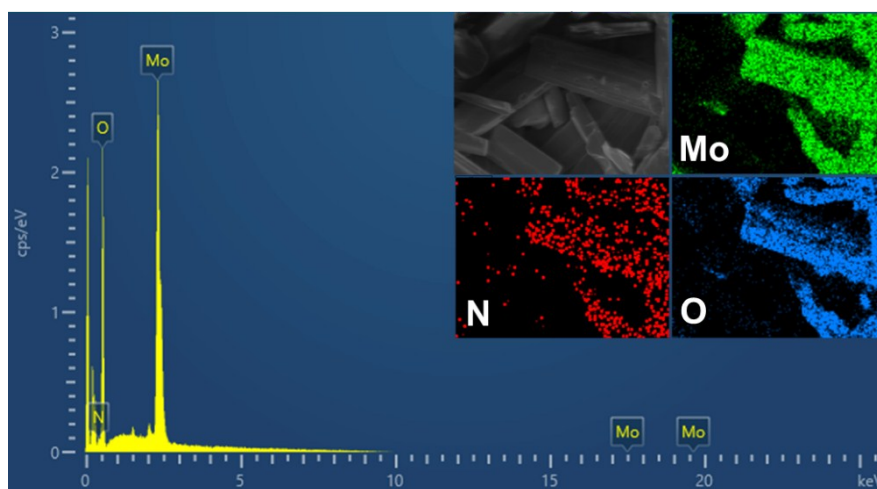

**Fig. S2** EDX-mapping result for the as-prepared h-MoO<sub>3</sub>.

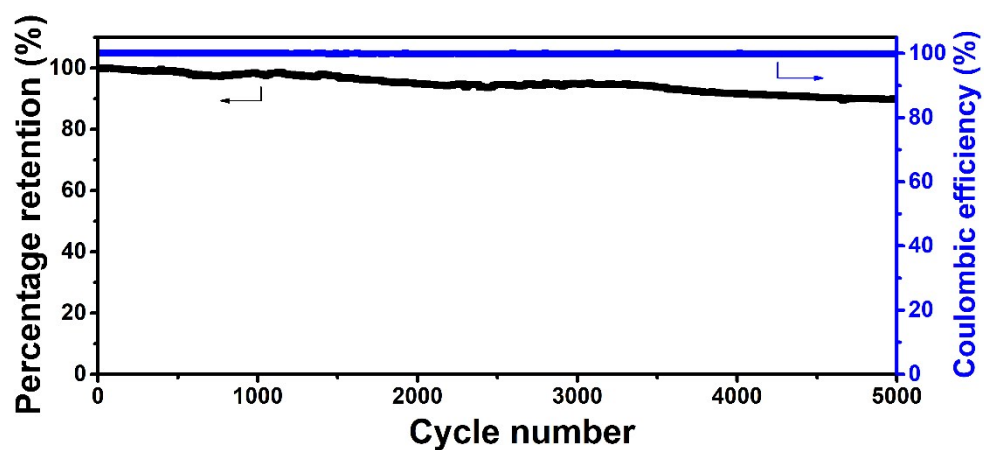

Fig. S3 The cyclic stability and Coulombic efficiency of Zn//h-MoO<sub>3</sub> cell at 2 A g<sup>-1</sup>.

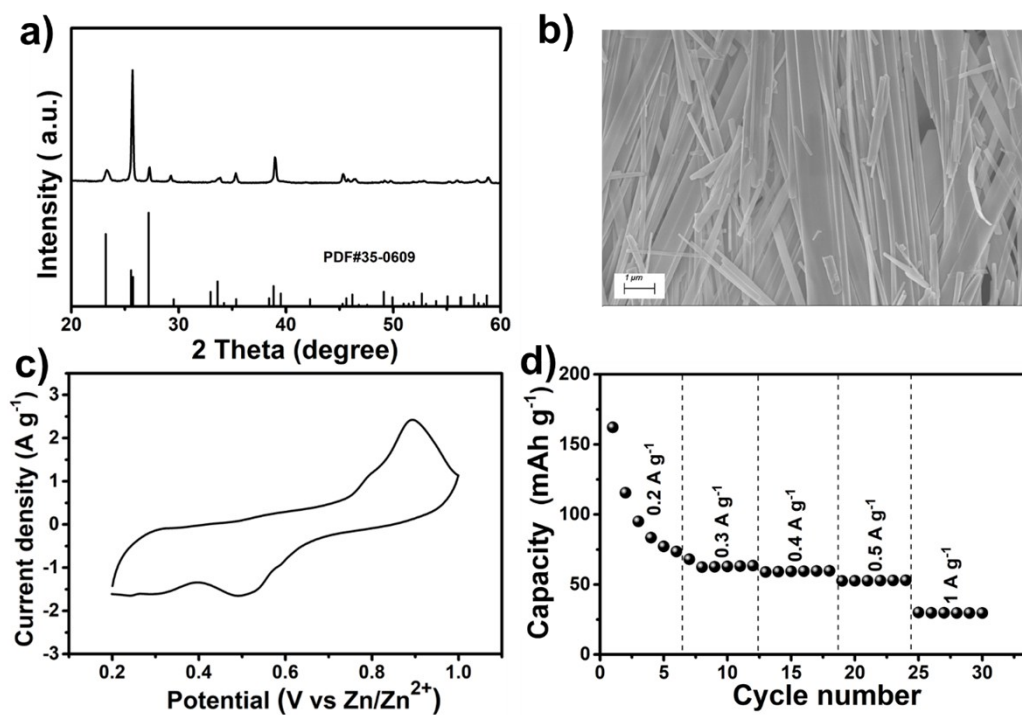

Fig. S4 a) XRD, b) SEM of the as-prepared  $\alpha$ -MoO<sub>3</sub>, c) CV, d) Rate performance of the Zn// $\alpha$ -MoO<sub>3</sub> cell.

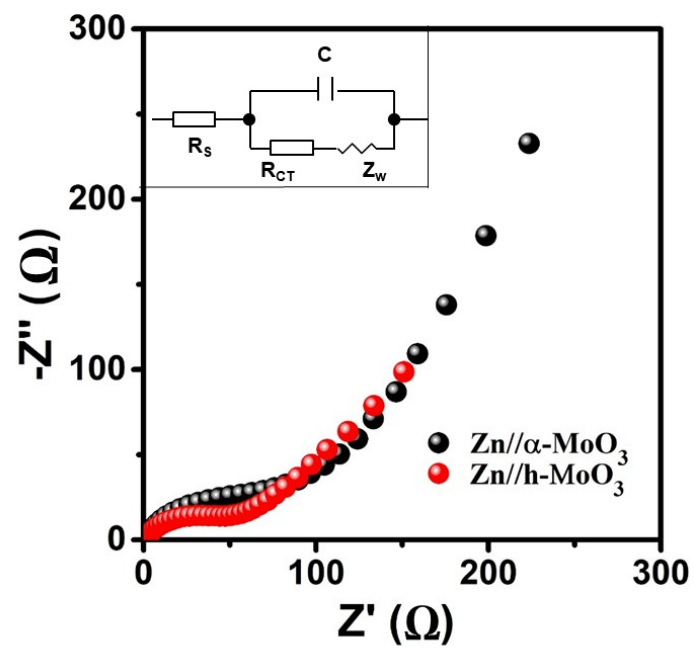

**Fig. S5** Nyquist plots of the fresh Zn// $\alpha$ -MoO<sub>3</sub> and fresh Zn//h-MoO<sub>3</sub> cells.

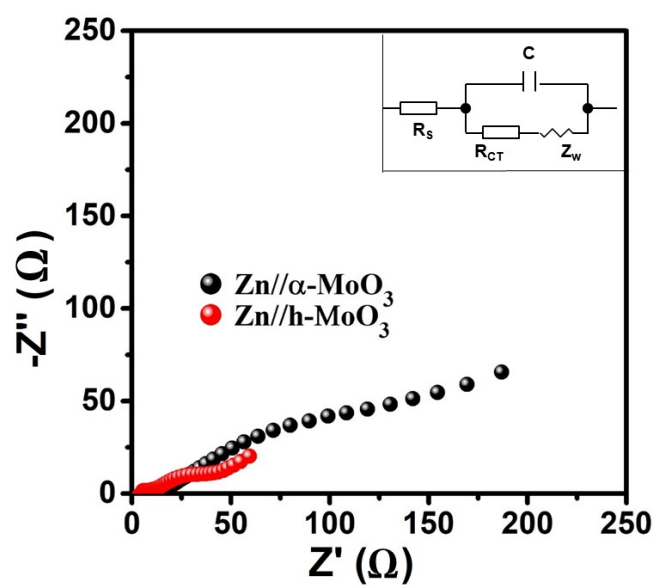

**Fig. S6** Nyquist plots of the cycled Zn// $\alpha$ -MoO<sub>3</sub> and cycled Zn//h-MoO<sub>3</sub> cells.

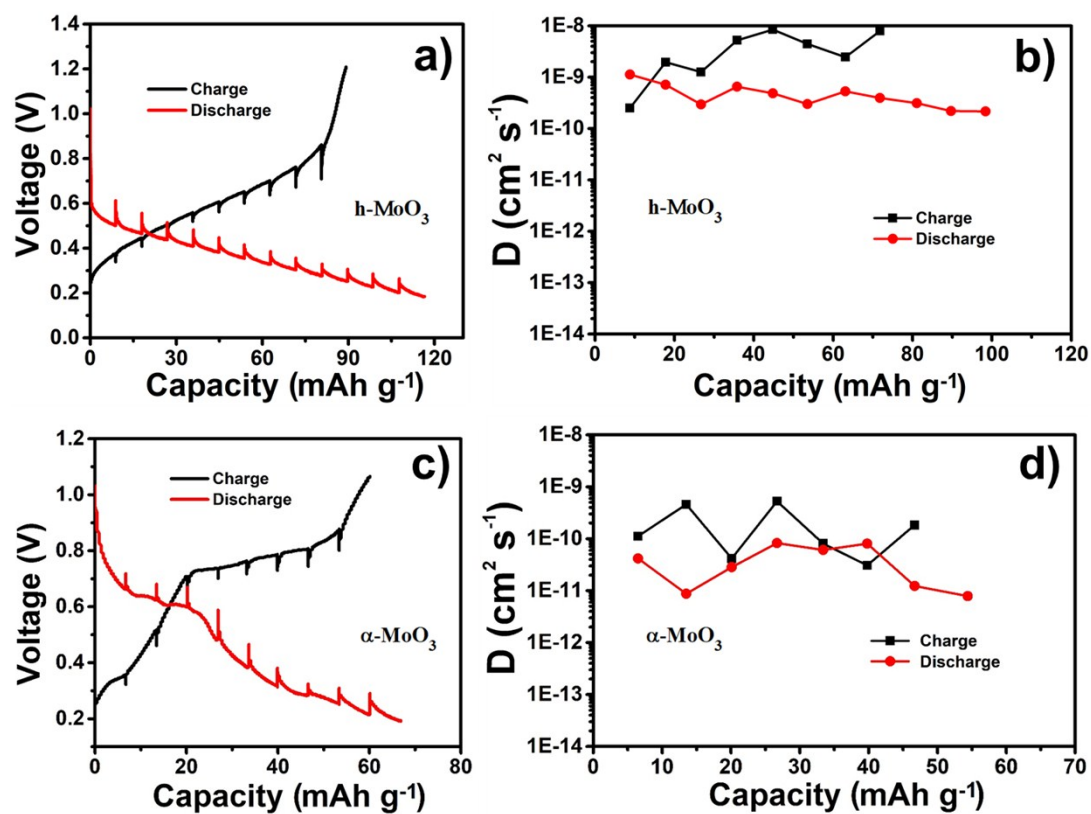

Fig. S7 GITT curves and diffusion coefficients of a),b) h-MoO<sub>3</sub> and c),d) α-MoO<sub>3</sub>.

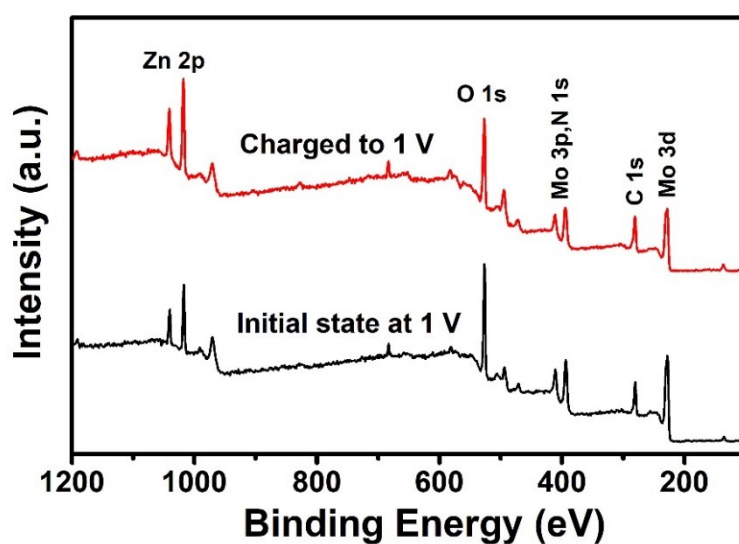

Fig. S8 XPS survey spectra of the h-MoO<sub>3</sub> at the initial state at 1V and the fully charged state at 1V.

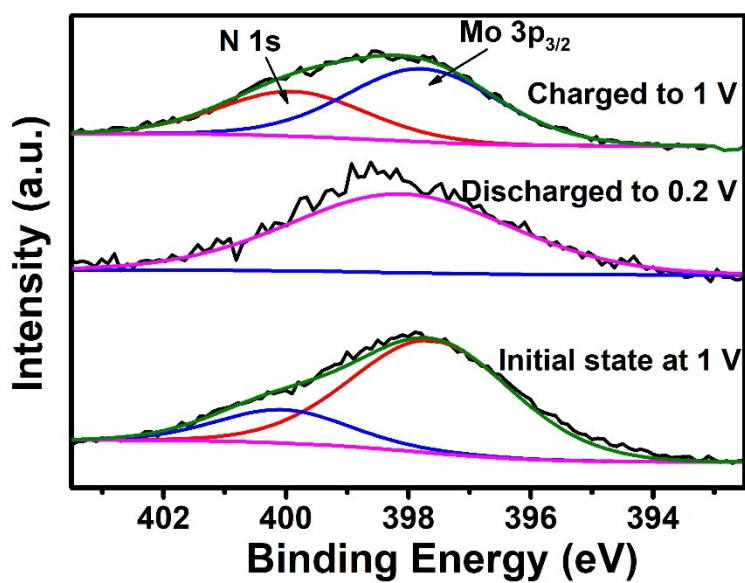

Fig. S9 N 1s XPS of the as-prepared h-MoO<sub>3</sub> at different states.

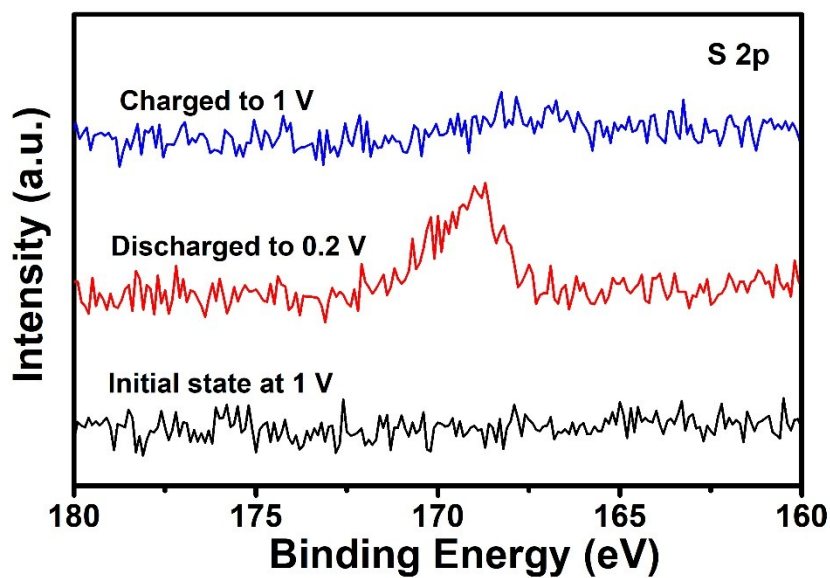

Fig. S10 S 2p XPS of the as-prepared h-MoO<sub>3</sub> at different states.

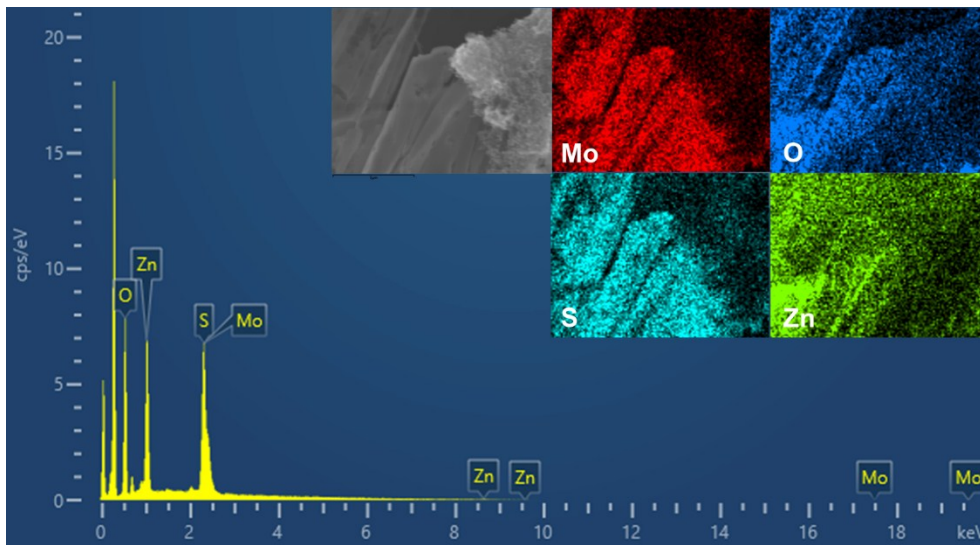

**Fig. S11** EDX mapping of the h-MoO<sub>3</sub> at the fully discharged state.

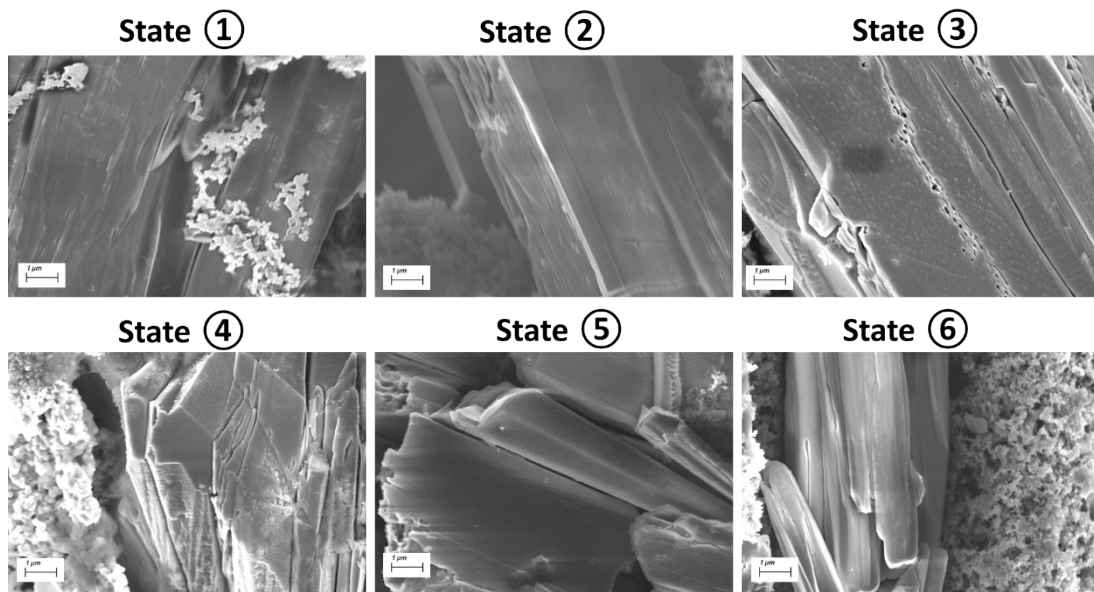

**Fig. S12** SEM images of the h-MoO<sub>3</sub> at various state in Fig. 2a.

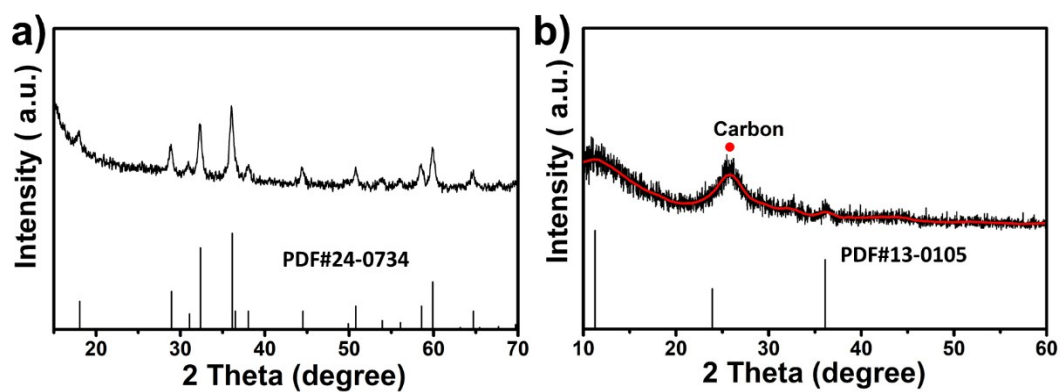

**Fig. S13** XRD of a)  $\text{Mn}_3\text{O}_4$  and b)  $\text{Zn}^{2+}$ -intercalated  $\text{MnO}_2$  (denoted as  $\text{Zn}_{0.2}\text{MnO}_2$ ).

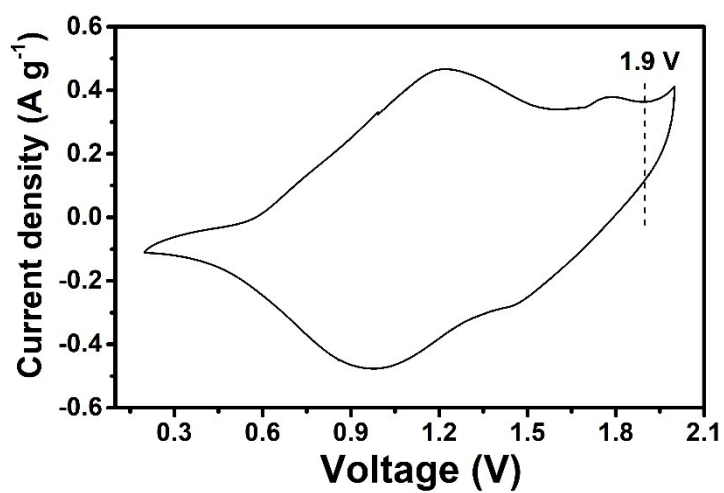

**Fig. S14** CV curve of  $\text{h-MoO}_3//\text{Zn}_{0.2}\text{MnO}_2$  battery at  $1 \text{ mV s}^{-1}$  in the voltage of 0.2-2.0 V.



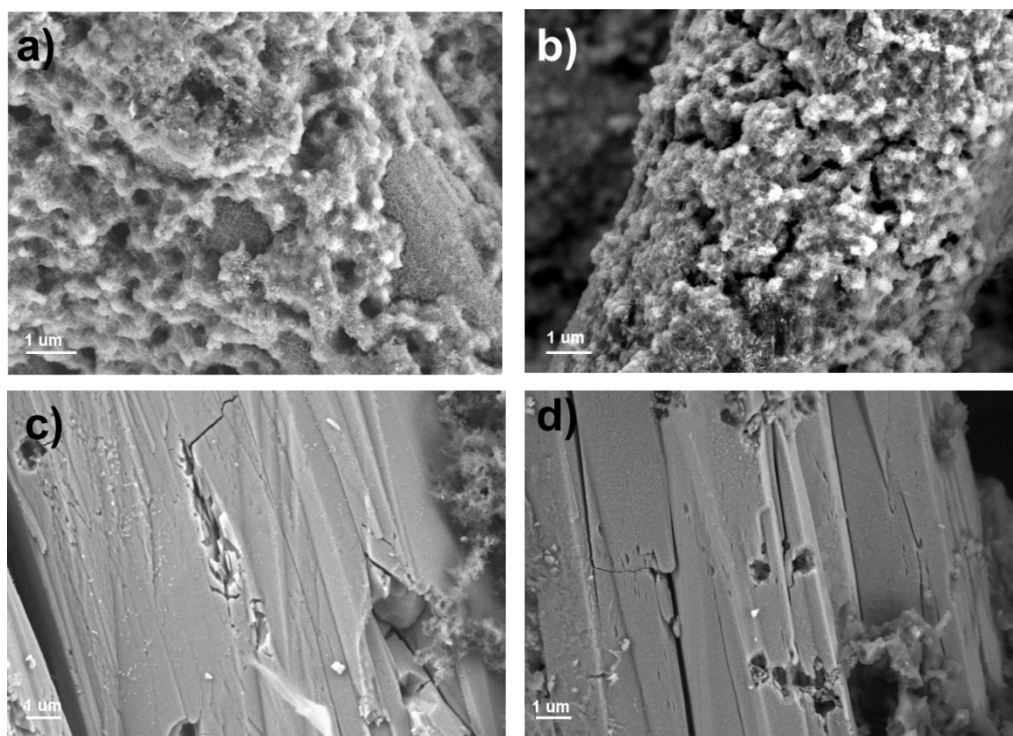

**Fig. S15** SEM images of the a) discharged  $Zn_{0.2}MnO_2$ , b) charged  $Zn_{0.2}MnO_2$ , c) discharged h- $MoO_3$ , and d) charged h- $MoO_3$ .

**Table S1.** Comparison of the batteries performance parameters for Zn metal batteries and our zinc metal free battery.

| Active material (active mass)                                                | Electrolytes                                              | Potential window | Capacity<br>(based on the mass of cathode)                      | Capacity<br>(based on the mass of cathode and anode) | Ref.      |
|------------------------------------------------------------------------------|-----------------------------------------------------------|------------------|-----------------------------------------------------------------|------------------------------------------------------|-----------|
| Zn//polyaniline-intercalated MnO <sub>2</sub>                                | 2M ZnSO <sub>4</sub> + 0.1M MnSO <sub>4</sub>             | 1–1.8 V          | 280 mA h g <sup>-1</sup> at 0.2 A g <sup>-1</sup>               | 1.1 mA h g <sup>-1</sup> at 0.2 A g <sup>-1</sup>    | 1         |
| Zn//NaV <sub>3</sub> O <sub>8</sub> ·1.5H <sub>2</sub> O                     | 1M ZnSO <sub>4</sub> + 1M Na <sub>2</sub> SO <sub>4</sub> | 0.3–1.25 V       | 380 mA h g <sup>-1</sup> at 0.1 A g <sup>-1</sup>               | 1.5 mA h g <sup>-1</sup> at 0.1 A g <sup>-1</sup>    | 2         |
| Zn//Co <sub>0.247</sub> V <sub>2</sub> O <sub>5</sub> ·0.944H <sub>2</sub> O | 20M LiTFSI + 1M Zn (TFSI) <sub>2</sub>                    | 0.6–2.2 V        | 15 Wh kg<br>432 mA h g <sup>-1</sup> at 0.1 A g <sup>-1</sup>   | 1.7 mA h g <sup>-1</sup> at 0.1 A g <sup>-1</sup>    | 3         |
| Zn//vanadium oxynitride                                                      | 3 M Zn (CF <sub>3</sub> SO <sub>3</sub> ) <sub>2</sub>    | 0.2–1.8 V        | 15 Wh kg<br>603 mAh g <sup>-1</sup> at 0.2C                     | 2.4 mAh g <sup>-1</sup> at 0.2C                      | 4         |
| Zn//oxygen-deficient V <sub>6</sub> O <sub>13</sub>                          | 3 M Zn(TFSI) <sub>2</sub>                                 | 0.2–1.5 V        | 15 Wh kg<br>401 mA h g <sup>-1</sup> at 0.2 A g <sup>-1</sup>   | 1.6 mA h g <sup>-1</sup> at 0.2 A g <sup>-1</sup>    | 5         |
| Zn//E-MoS <sub>2</sub>                                                       | 1 M ZnSO <sub>4</sub>                                     | 0–1.3 V          | 15 Wh kg<br>202.6 mA h g <sup>-1</sup> at 0.1 A g <sup>-1</sup> | 0.8 mA h g <sup>-1</sup> at 0.1 A g <sup>-1</sup>    | 6         |
| Zn//V <sub>2</sub> O <sub>5</sub> nanopaper                                  | 2 M ZnSO <sub>4</sub>                                     | 0.2–1.6V         | 375 mAh g <sup>-1</sup> at 0.5 A g <sup>-1</sup>                | 1.5 mAh g <sup>-1</sup> at 0.5 A g <sup>-1</sup>     | 7         |
| Zn//oxygen-deficient MnO <sub>2</sub>                                        | 1 M ZnSO <sub>4</sub> + 0.2M MnSO <sub>4</sub>            | 1–1.8 V          | 345 mAh g <sup>-1</sup> at 0.2 A g <sup>-1</sup>                | 1.4 mAh g <sup>-1</sup> at 0.2 A g <sup>-1</sup>     | 8         |
| h-MoO <sub>3</sub> //Zn <sub>0.2</sub> MnO <sub>2</sub>                      | 1 M ZnSO <sub>4</sub>                                     | 0.2–1.9 V        | -                                                               | 56.7 mAh g <sup>-1</sup> at 0.1 A g <sup>-1</sup>    | This work |

## References

- 1 J. Huang, Z. Wang, M. Hou, X. Dong, Y. Liu, Y. Wang and Y. Xia, *Nat. Commun.*, 2018, **9**, 2906.
- 2 F. Wan, L. Zhang, X. Dai, X. Wang, Z. Niu and J. Chen, *Nat. Commun.* 2018, **9**, 1656.
- 3 L. Ma, N. Li, C. Long, B. Dong, D. Fang, Z. Liu, Y. Zhao, X. Li, J. Fan, S. Chen, S. Zhang and C. Zhi, *Adv. Funct. Mater.* 2019, **29**, 1906142.
- 4 J. Ding, Z. Du, B. Li, L. Wang, S. Wang, Y. Gong and S. Yang, *Adv. Mater.* 2019, **31**, 1904369.
- 5 M. Liao, J. Wang, L. Ye, H. Sun, Y. Wen, C. Wang, X. Sun, B. Wang and H. Peng, *Angew. Chem. Int. Ed.* 2020, **59**, 2273–2278.
- 6 H. Li, Q. Yang, F. Mo, G. Liang, Z. Liu, Z. Tang, L. Ma, J. Liu, Z. Shi and C. Zhi, *Energy Storage Materials*, 2019, **19**, 94-101.
- 7 Y. Li, Z. Huang, P. K. Kalambate, Y. Zhong, Z. Huang, M. Xie, Y. Shen and Y. Huang, *Nano Energy*, 2019, **60**, 752–759.
- 8 T. Xiong, Z. G. Yu, H. Wu, Y. Du, Q. Xie, J. Chen, Y.-W. Zhang, S. J. Pennycook, W. S. V. Lee and J. Xue, *Adv. Energy Mater.*, 2019, **9**, 1803815.
